# Supplementary material
Source: ML conference proceedings conference paper supplement (https://openreview.net/forum?id=CWdxHxVAGG)
Supplement: supplementary_material [file attachment]

## Supplementary material

Appendix A provides proofs of theorems stated in Sec 2, where we presented the proposed reject option models for the OOD setup and their optimal strategies. Appendix A is organized as follows:

- Appendix A.1. Proof of Theorem 1 providing an optimal strategy of the cost-based OOD model.
- Appendix A.2. Proof of Theorem 2 and Theorem 4 that claim that the Bayes ID classifier (4) is an optimal solution of the bounded TPR-FPR and the bounded Precision-Recall model, respectively. The proof of both theorems is the same, hence we put it to the same section.
- Appendix A.3. Proof of Theorem 3 providing a form of an optimal selective function under the bounded TPR-FPR model for an arbitrary fixed ID classifier.
- Appendix A.4. In this section, we characterize the form of  $\tau(x)$  function, which defines the acceptance probability of boundary inputs  $\mathcal{X}_{s(x)=\lambda} = \{x \in \mathcal{X} \mid s(x) = \lambda\}$  for the optimal selective function (9).
- Appendix A.5. In the case of finite input space, i.e.  $|\mathcal{X}| < \infty$ , we can find an optimal selective function under the bounded TRP-FPR model via Linear Programming described in this section.
- Appendix A.6. Proof of Theorem 5 providing a form of an optimal selective function under the Bounded Precision-Recall model for an arbitrary fixed ID classifier.

Appendix B provides supplementary material for Sec. 3. The evaluation curves obtained for the exemplar methods on synthetic data are shown in Sec B.1. The algorithm to solve the problems (13) and (14) is discussed in Sec. B.2.

## A Proofs of theorems from Sec 2

### A.1 Proof of Theorem 1

Due to the additivity of the expected risk  $R(h, c) = \mathbb{E}_{x, y \sim p(x, \bar{y})} \bar{\ell}(\bar{y}, (h, c)(x))$ , the optimal strategy minimizing the risk can be found for each input  $x \in \mathcal{X}$  separately by solving

$$q^*(x) = \operatorname{argmin}_{q \in \mathcal{Y}} R_x(q)$$

where  $R_x(q)$  is the partial risk defined as

$$\begin{aligned} R_x(q) &= \sum_{\bar{y} \in \mathcal{Y}} p(x, \bar{y}) \bar{\ell}(\bar{y}, q) = p_O(x) \pi \left( \mathbb{I}[q = \emptyset] \epsilon_3 + \mathbb{I}[q(x) \neq \emptyset] \epsilon_2 \right) \\ &\quad + (1 - \pi) \sum_{y \in \mathcal{Y}} p_I(x, y) \left( \mathbb{I}[q = \emptyset] \epsilon_1 + \mathbb{I}[q \neq \emptyset] \ell(y, q) \right) \end{aligned}$$

We can see that

$$\begin{aligned} R_x(q = \text{reject}) &= p_O(x) \pi \epsilon_3 + P_I(x) (1 - \pi) \epsilon_1 \\ R_x(q \neq \text{reject}) &= p_O(x) \pi \epsilon_2 + (1 - \pi) \sum_{y \in \mathcal{Y}} p_I(x, y) \ell(y, q) \\ \min_{q \in \mathcal{Y}} R_x(q) &= p_O(x) \pi \epsilon_2 + (1 - \pi) p_I(x) r_B(x), \end{aligned}$$

where  $r(x)$  is the minimal conditional risk

$$r_B(x) = \min_{\hat{y} \in \mathcal{Y}} \sum_{y \in \mathcal{Y}} p_I(y \mid x) \ell(y, \hat{y})$$

It is optimal to reject when

$$\begin{aligned} 0 &\leq \min_{q \in \mathcal{Y}} R_x(q) - R_x(q = \text{reject}) \\ &= p_O(x) \pi \epsilon_2 + (1 - \pi) p_I(x) r(x) - p_O(x) \pi \epsilon_3 - p_I(x) (1 - \pi) \epsilon_1 \\ &= p_O(x) \pi (\epsilon_2 - \epsilon_3) + (1 - \pi) p_I(x) (r_B(x) - \epsilon_1) \\ &= s(x). \end{aligned}$$

444 The inequality  $0 \leq s(x)$  is equivalent to

$$r_B(x) + (\varepsilon_2 - \varepsilon_3) \frac{\pi}{1 - \pi} g(x) \geq \epsilon_1 .$$

445 In case that  $\pi < 10$  and  $\frac{K}{0} = \infty$ , the optimal strategy then reads

$$q^* = \begin{cases} \text{reject} & \text{if } s(x) \geq 0 \\ \operatorname{argmin}_{\hat{y} \in \mathcal{Y}} \sum_{y \in \mathcal{Y}} p_I(x, y) \ell(y, \hat{y}) & \text{if } s(x) \leq 0 \end{cases}$$

446 Note that in the boundary case  $s(x) = 0$  we can reject or accept arbitrarily without affecting the  
447 solution.

## 448 A.2 Proof of Theorem 2 and Theorem 4

449 The definition of  $h_B$  allows to derive  $R^S(h_B, c) \leq R^S(h, c)$  as follows:

$$\begin{aligned} R^S(h_B, c) &= \frac{1}{\phi(c)} \int_{\mathcal{X}} \sum_{y \in \mathcal{Y}} p(x, y) \ell(y, h_B(x)) c(x) dx \\ &= \frac{1}{\phi(c)} \int_{\mathcal{X}} p(x) c(x) \left( \sum_{y \in \mathcal{Y}} p(y | x) \ell(y, h_B(x)) \right) dx \\ &\leq \frac{1}{\phi(c)} \int_{\mathcal{X}} p(x) c(x) \left( \sum_{y \in \mathcal{Y}} p(y | x) \ell(y, h(x)) \right) dx \\ &= \frac{1}{\phi(c)} \int_{\mathcal{X}} \sum_{y \in \mathcal{Y}} p(x, y) \ell(y, h(x)) c(x) dx \\ &= R^S(h, c) . \end{aligned}$$

## 450 A.3 Proof of Theorem 3

451 It is a direct consequence of the following theorem.

452 **Theorem 6.** *For any  $(h, c)$  optimal to (8), there exist real numbers  $\lambda, \mu$  such that*

$$\begin{aligned} \int_{\mathcal{X}^<} p_I(x) c(x) dx &= \int_{\mathcal{X}^<} p_I(x) dx , \\ \int_{\mathcal{X}^>} p_I(x) c(x) dx &= 0 , \end{aligned}$$

453 where

$$\begin{aligned} \mathcal{X}^< &= \{x \in \mathcal{X} \mid r(x) + \mu \frac{p_O(x)}{p_I(x)} < \lambda\} , \\ \mathcal{X}^> &= \{x \in \mathcal{X} \mid r(x) + \mu \frac{p_O(x)}{p_I(x)} > \lambda\} . \end{aligned}$$

454 *Proof.* We first give a proof for countable sets  $\mathcal{X}$ , when integrals can be expressed as sums, then we  
455 present its generalization to arbitrary  $\mathcal{X}$ .

456 Assume  $\mathcal{X}$  is countable and  $(h, c)$  is optimal to (8). Observe that we do not need to pay attention to  
457 those  $x \in \mathcal{X}$  for which  $p_I(x) = 0$  as they do not have any impact on the theorem statement. Denote

$$\begin{aligned} \mathcal{X}^+ &= \{x \in \mathcal{X} \mid p_I(x) > 0\} , \\ \mathcal{X}_0 &= \{x \in \mathcal{X}^+ \mid c(x) = 0\} , \\ \mathcal{X}_1 &= \{x \in \mathcal{X}^+ \mid c(x) = 1\} , \\ \mathcal{X}_2 &= \{x \in \mathcal{X}^+ \mid 0 < c(x) < 1\} . \end{aligned}$$

Let  $P : \mathcal{X}^+ \rightarrow \mathbb{R}_+^2$  be a mapping such that  $P(x) = \left( \frac{p_O(x)}{p_I(x)}, \frac{R(x)}{p_I(x)} \right)$ , where

$$R(x) = \sum_{y \in \mathcal{Y}} p(x, y) \ell(y, h(x)).$$

To confirm the existence of suitable  $\lambda, \mu$ , it suffices to show that the sets

$$A_0 = \{P(x) \mid x \in \mathcal{X}_0\}, \quad (15)$$

$$A_1 = \{P(x) \mid x \in \mathcal{X}_1\}, \quad (16)$$

$$A_2 = \{P(x) \mid x \in \mathcal{X}_2\} \quad (17)$$

are “almost” linearly separable, i.e., there is a line  $L$  that includes  $A_2$  and linearly separates the sets  $A_0 \setminus L, A_1 \setminus L$ . The existence of such  $L$  is ensured if

$$\dim \text{span}((\text{conv}(A_0) \cap \text{conv}(A_1)) \cup A_2) < 2, \quad (18)$$

where  $\text{conv}(\cdot)$  denotes the convex hull and  $\text{span}(\cdot)$  denotes the span of a set of vectors.

We will check validity of condition (18) by using the following two claims.

**Claim 6.1.** Let  $x_1, x_2 \in \mathcal{X}^+$ ,  $r(x_1) > r(x_2)$ , and  $\frac{p_O(x_1)}{p_I(x_1)} \geq \frac{p_O(x_2)}{p_I(x_2)}$ . Then,  $x_1 \in \mathcal{X}_0$  or  $x_2 \in \mathcal{X}_1$ .

*Proof of the claim.* By contradiction. Assume  $c(x_1) > 0$  and  $c(x_2) < 1$ . Define a selective function  $c'$  which is identical to  $c$  up to  $c'(x_1) = c(x_1) - \Delta$ ,  $c'(x_2) = c(x_2) + \frac{p_I(x_1)}{p_I(x_2)} \Delta$ , where

$$\Delta = \min \left\{ c(x_1), \frac{p_I(x_2)}{p_I(x_1)} (1 - c(x_2)) \right\} > 0.$$

Now, observe that

$$\phi(c') - \phi(c) = -\Delta \cdot p_I(x_1) + \frac{p_I(x_1)}{p_I(x_2)} \Delta \cdot p_I(x_2) = 0,$$

$$\rho(c') - \rho(c) = -\Delta \cdot p_O(x_1) + \frac{p_I(x_1)}{p_I(x_2)} \Delta \cdot p_O(x_2) \leq 0, \quad \text{and}$$

$$\phi(c) (R^S(h, c') - R^S(h, c)) = -\Delta \cdot R(x_1) + \frac{p_I(x_1)}{p_I(x_2)} \Delta \cdot R(x_2) = \Delta \cdot p_I(x_1) (r(x_2) - r(x_1)) < 0$$

contradicts the optimality of  $(h, c)$ . ■

**Claim 6.2.** Let  $x_1, x_2, x_3$  be elements of  $\mathcal{X}^+$  such that the points  $P_1 = P(x_1), P_2 = P(x_2), P_3 = P(x_3)$  are non-collinear and  $\beta \cdot P_3 = \alpha_1 \cdot P_1 + \alpha_2 \cdot P_2$  holds for some  $\alpha_1, \alpha_2, \beta \in \mathbb{R}_+$ , where  $\alpha_1 + \alpha_2 = 1$ .

• If  $\beta < 1$ , then  $x_3 \in \mathcal{X}_0$  or  $\{x_1, x_2\} \cap \mathcal{X}_1 \neq \emptyset$ .

• If  $\beta > 1$ , then  $x_3 \in \mathcal{X}_1$  or  $\{x_1, x_2\} \cap \mathcal{X}_0 \neq \emptyset$ .

*Proof of the claim.* We will give a proof for  $\beta < 1$  and note that the steps for  $\beta > 1$  are analogous.

By contradiction. Assume  $c(x_1) < 1$ ,  $c(x_2) < 1$ , and  $c(x_3) > 0$ . To simplify the notation, for  $i \in \{1, 2, 3\}$ , let  $p_i = p_I(x_i)$ ,  $q_i = p_O(x_i)$ , and  $R_i = R(x_i)$ .

Define a selective function  $c'$  which is identical to  $c$  up to

$$c'(x_1) = c(x_1) + \Delta \cdot \alpha_1 \frac{p_3}{p_1},$$

$$c'(x_2) = c(x_2) + \Delta \cdot \alpha_2 \frac{p_3}{p_2},$$

$$c'(x_3) = c(x_3) - \Delta,$$

480 where

$$\Delta = \min \left\{ c(x_3), \frac{p_1}{\alpha_1 p_3} (1 - c(x_1)), \frac{p_2}{\alpha_2 p_3} (1 - c(x_2)) \right\} > 0.$$

481 Observe that

$$\begin{aligned} 482 \quad \phi(c') - \phi(c) &= \Delta \alpha_1 p_3 + \Delta \alpha_2 p_3 - \Delta p_3 = 0, \\ \rho(c') - \rho(c) &= \Delta \alpha_1 \frac{p_3}{p_1} q_1 + \Delta \alpha_2 \frac{p_3}{p_2} q_2 - \Delta q_3 = \Delta(\beta - 1) q_3 \leq 0, \quad \text{and} \\ 483 \quad \phi(c) (R^S(h, c') - R^S(h, c)) &= \Delta \alpha_1 \frac{p_3}{p_1} R_1 + \Delta \alpha_2 \frac{p_3}{p_2} R_2 - \Delta R_3 \\ &= \Delta p_3 \left( \alpha_1 \frac{R_1}{p_1} + \alpha_2 \frac{R_2}{p_2} \right) - \Delta R_3 = \Delta p_3 \beta \frac{R_3}{p_3} - \Delta R_3 \\ &= \Delta(\beta - 1) R_3 < 0 \end{aligned}$$

484 contradicts the optimality of  $c$ . ■

485 We are ready to confirm condition (18), this is done by analyzing the potential infeasible cases.

- 486 1.  $\dim \text{span}(\text{conv}(A_0) \cap \text{conv}(A_1)) = 2$ . Then, there are  $x_1, x_2, x_3, x_4 \in \mathcal{X}^+$  such that  
 487  $P(x_1), P(x_2), P(x_3)$  are non-collinear,  $P(x_4)$  is inside the triangle  $P(x_1), P(x_2), P(x_3)$ ,  
 488 and, either  $x_1, x_2, x_3 \in \mathcal{X}_0, x_4 \in \mathcal{X}_1$ , or  $x_1, x_2, x_3 \in \mathcal{X}_1, x_4 \in \mathcal{X}_0$ .
- 489 2.  $\dim \text{span}(A_2) = 2$ . There are  $x_1, x_2, x_3 \in \mathcal{X}_2$  such that  $P(x_1), P(x_2), P(x_3)$  are non-  
 490 collinear.
- 491 3.  $\dim \text{span}(\text{conv}(A_0) \cap \text{conv}(A_1)) = 1$  and  $\dim \text{span}((\text{conv}(A_0) \cap \text{conv}(A_1)) \cup A_2) = 2$ .  
 492 There are  $x_1, x_2 \in \mathcal{X}_0, x_3, x_4 \in \mathcal{X}_1, x_5 \in \mathcal{X}_2$  such that points  $P(x_1), P(x_3)$  lie on a half-  
 493 line  $H_1$ , points  $P(x_2), P(x_4)$  lie on a half-line  $H_2$ , where  $H_1 \cap H_2 = \emptyset$  and  $\text{conv}(H_1 \cup H_2)$   
 494 is a line not containing  $P(x_5)$ .
- 495 4.  $\dim \text{span}(A_2) = 1$ , and  $\dim \text{span}((\text{conv}(A_0) \cap \text{conv}(A_1)) \cup A_2) = 2$ . There are  $x_1 \in \mathcal{X}_0$ ,  
 496  $x_2 \in \mathcal{X}_1, x_3, x_4 \in \mathcal{X}_2$  such that  $P(x_3) \neq P(x_4)$ , points  $P(x_3), P(x_4)$  lie on a line  $L$ , and  
 497 points  $P(x_1), P(x_2)$  lie in one half-plane of  $L$ , but not on  $L$ .

498 It is not difficult to check that all the listed points configurations always enable to select a subset of  
 499 two or three points whose existence is ruled out by Claim 6.1 or Claim 6.2, respectively.

500 Consider now that  $\mathcal{X}$  is an arbitrary set.

501 For  $a, b, \varepsilon \in \mathbb{R}_+$ , where  $\varepsilon > 0$ , let  $B_{a,b,\varepsilon} = \{(x, y) \mid a \leq x < a + \varepsilon \wedge b \leq y < b + \varepsilon\}$ .

502 For a given  $\varepsilon > 0$ , we can decompose the positive quadrant  $Q = \{(x, y) \mid x \in \mathbb{R}_+, y \in \mathbb{R}_+\}$  into  
 503 countably many pairwise disjoint sets as follows

$$Q = \bigcup \mathcal{B}(\varepsilon), \quad \mathcal{B}(\varepsilon) = \{B_{\varepsilon m, \varepsilon n, \varepsilon} \mid m, n \in \mathbb{N}\}.$$

504 For  $B \in \mathcal{B}(\varepsilon)$ , define

$$\begin{aligned} \mathcal{X}(B) &= \{x \in \mathcal{X}^+ \mid P(x) \in B\}, \\ p_I(B) &= \int_{\mathcal{X}(B)} p_I(x) dx. \end{aligned}$$

505 In analogy to  $\mathcal{X}^+, \mathcal{X}_0, \mathcal{X}_1, \mathcal{X}_2$ , define

$$\begin{aligned} \mathcal{B}^+(\varepsilon) &= \{B \in \mathcal{B}(\varepsilon) \mid p_I(B) > 0\}, \\ c(B) &= \frac{1}{p_I(B)} \int_{\mathcal{X}(B)} p_I(x) c(x) dx \quad \forall B \in \mathcal{B}^+(\varepsilon), \\ \mathcal{B}_0(\varepsilon) &= \{B \in \mathcal{B}^+(\varepsilon) \mid c(B) = 0\}, \\ \mathcal{B}_1(\varepsilon) &= \{B \in \mathcal{B}^+(\varepsilon) \mid c(B) = 1\}, \\ \mathcal{B}_2(\varepsilon) &= \{B \in \mathcal{B}^+(\varepsilon) \mid 0 < c(B) < 1\}. \end{aligned}$$

506 The set  $\mathcal{B}^+(\varepsilon)$  can thus be viewed as a discretisation of  $\mathcal{X}$ .

507 Since  $a \cdot p_I(x) \leq p_O(x) \leq (a+\varepsilon) \cdot p_I(x)$  and  $b \cdot p_I(x) \leq R(x) \leq (b+\varepsilon) \cdot p_I(x)$  for all  $x \in \mathcal{X}(B_{a,b,\varepsilon})$ ,  
 508 it holds

$$a \cdot p_I(B_{a,b,\varepsilon})c(B_{a,b,\varepsilon}) \leq \int_{\mathcal{X}(B_{a,b,\varepsilon})} p_O(x)c(x)dx \leq (a+\varepsilon) \cdot p_I(B_{a,b,\varepsilon})c(B_{a,b,\varepsilon}), \quad (19)$$

509

$$b \cdot p_I(B_{a,b,\varepsilon})c(B_{a,b,\varepsilon}) \leq \int_{\mathcal{X}(B_{a,b,\varepsilon})} R(x)c(x)dx \leq (b+\varepsilon) \cdot p_I(B_{a,b,\varepsilon})c(B_{a,b,\varepsilon}). \quad (20)$$

510 Define

$$\begin{aligned} \check{P}(B_{a,b,\varepsilon}) &= (a, b), \\ \hat{P}(B_{a,b,\varepsilon}) &= (a+\varepsilon, b+\varepsilon), \end{aligned}$$

511 i.e.,  $\check{P}(B_{a,b,\varepsilon})$  and  $\hat{P}(B_{a,b,\varepsilon})$  is the bottom-left and top-right corner of  $B_{a,b,\varepsilon}$ , respectively.

512 Claims 6.1 and 6.2 can be generalized to elements of  $\mathcal{B}^+(\varepsilon)$  as follows.

513 **Claim 6.3.** Let  $B_{a,b,\varepsilon}, B_{a',b',\varepsilon} \in \mathcal{B}^+(\varepsilon)$ ,  $a \geq a' + \varepsilon$ , and  $b > b' + \varepsilon$ . Then,  $B_{a,b,\varepsilon} \in \mathcal{B}_0(\varepsilon)$  or  
 514  $B_{a',b',\varepsilon} \in \mathcal{B}_1(\varepsilon)$ .

515 *Proof of the claim.* Denote  $B = B_{a,b,\varepsilon}$ ,  $B' = B_{a',b',\varepsilon}$ . By contradiction. Assume  $c(B) > 0$   
 516 and  $c(B') < 1$ . Find a selective function  $c'$  which is identical to  $c$  up to  $c'(B) = c(B) - \Delta$ ,  
 517  $c'(B') = c(B) + \frac{p_I(B)}{p_I(B')} \Delta$ , where

$$\Delta = \min \left\{ c(B), \frac{p_I(B')}{p_I(B)} (1 - c(B')) \right\} > 0.$$

518 Observe that

$$\phi(c') - \phi(c) = -\Delta \cdot p_I(B) + \frac{p_I(B)}{p_I(B')} \Delta \cdot p_I(B') = 0.$$

519 With the use of (19) and (20), derive

$$\begin{aligned} \rho(c') - \rho(c) &= \int_{\mathcal{X}(B')} p_O(x)c'(x)dx - \int_{\mathcal{X}(B)} p_O(x)c(x)dx \leq (a' + \varepsilon)p_I(B')c(B') - a \cdot p_I(B)c(B) \\ &\leq a(\phi(c') - \phi(c)) = 0, \quad \text{and} \end{aligned}$$

520

$$\begin{aligned} \phi(c) (R^S(h, c') - R^S(h, c)) &= \int_{\mathcal{X}(B')} R(x)c'(x)dx - \int_{\mathcal{X}(B)} R(x)c(x)dx \\ &\leq (b' + \varepsilon)p_I(B')c(B') - b \cdot p_I(B)c(B) \\ &< b \cdot (\phi(c') - \phi(c)) = 0. \end{aligned}$$

521 Hence,  $(h, c')$  contradicts the optimality of  $(h, c)$ . ■

522 **Claim 6.4.** Let  $\varepsilon > 0$  and  $B_1, B_2, B_3$  be elements of  $\mathcal{B}^+(\varepsilon)$ .

523 • If  $\beta \cdot \check{P}(B_3) = \alpha_1 \cdot \hat{P}(B_1) + \alpha_2 \cdot \hat{P}(B_2)$ , where  $\alpha_1, \alpha_2, \beta \in \mathbb{R}_+$ ,  $\alpha_1 + \alpha_2 = 1$ ,  $\beta < 1$ , then  
 524  $B_3 \in \mathcal{B}_0(\varepsilon)$  or  $\{B_1, B_2\} \cap \mathcal{B}_1(\varepsilon) \neq \emptyset$ .

525 • If  $\beta \cdot \hat{P}(B_3) = \alpha_1 \cdot \check{P}(B_1) + \alpha_2 \cdot \check{P}(B_2)$ , where  $\alpha_1, \alpha_2, \beta \in \mathbb{R}_+$ ,  $\alpha_1 + \alpha_2 = 1$ ,  $\beta > 1$ , then  
 526  $B_3 \in \mathcal{B}_1(\varepsilon)$  or  $\{B_1, B_2\} \cap \mathcal{B}_0(\varepsilon) \neq \emptyset$ .

527 *Proof of the claim.* Apply the technique from the proof of Claim 6.3 to the proof of Claim 6.2. ■

528 For  $\varepsilon > 0$ , define

$$C_0(\varepsilon) = \bigcup \mathcal{B}_0(\varepsilon), \quad C_1(\varepsilon) = \bigcup \mathcal{B}_1(\varepsilon), \quad C_2(\varepsilon) = \bigcup \mathcal{B}_2(\varepsilon).$$

For  $\varepsilon > \varepsilon' > 0$ , let  $B \in \mathcal{B}^+(\varepsilon)$ ,  $B' \in \mathcal{B}^+(\varepsilon')$ ,  $B' \subset B$ . Observe that  $B \in \mathcal{B}_0(\varepsilon)$  and  $p_I(B') > 0$  implies  $B' \in \mathcal{B}_0(\varepsilon')$ . And similarly,  $B \in \mathcal{B}_1(\varepsilon)$  and  $p_I(B') > 0$  implies  $B' \in \mathcal{B}_1(\varepsilon')$ . This means that

$$\begin{aligned} C_2\left(\frac{\varepsilon}{2}\right) &\subseteq C_2(\varepsilon), \\ C_0\left(\frac{\varepsilon}{2}\right) \cup C_2\left(\frac{\varepsilon}{2}\right) &\subseteq C_0(\varepsilon) \cup C_2(\varepsilon), \\ C_1\left(\frac{\varepsilon}{2}\right) \cup C_2\left(\frac{\varepsilon}{2}\right) &\subseteq C_1(\varepsilon) \cup C_2(\varepsilon). \end{aligned}$$

We can thus define

$$\begin{aligned} C_2 &= \lim_{n \rightarrow \infty} C_2\left(\frac{\varepsilon}{2^n}\right), \\ C_0 &= \left(\lim_{n \rightarrow \infty} \left[C_0\left(\frac{\varepsilon}{2^n}\right) \cup C_2\left(\frac{\varepsilon}{2^n}\right)\right]\right) \setminus C_2, \\ C_1 &= \left(\lim_{n \rightarrow \infty} \left[C_1\left(\frac{\varepsilon}{2^n}\right) \cup C_2\left(\frac{\varepsilon}{2^n}\right)\right]\right) \setminus C_2. \end{aligned}$$

where we utilize the fact: if a sequence of sets  $\{D_n\}_{n=0}^\infty$  fulfills  $D_{n+1} \subseteq D_n \subseteq \mathbb{R}^2$  for all  $n \in \mathbb{N}$ , then  $\lim_{n \rightarrow \infty} D_n = \bigcap_{n=0}^\infty D_n$ .

Note that each  $C_i$  corresponds to  $A_i$  (see 15– 17) in the following sense:

$$\int_{\mathcal{X}(A_2 \Delta C_2)} p(x) dx = 0, \quad \int_{\mathcal{X}((A_0 \cup A_2) \Delta (C_0 \cup C_2))} p(x) dx = 0, \quad \int_{\mathcal{X}((A_1 \cup A_2) \Delta (C_1 \cup C_2))} p(x) dx = 0,$$

where  $\Delta$  denotes the symmetric difference of two sets.

It holds

$$\dim \text{span}((\text{conv}(C_0) \cap \text{conv}(C_1)) \cup C_2) < 2,$$

otherwise we can find  $\varepsilon > 0$  and a configuration of two or three elements of  $\mathcal{B}^+(\varepsilon)$  which is ruled out by Claims 6.3 and 6.4 (the analysis of infeasible configurations is analogous to cases 1– 4).  $\square$

#### A.4 Characterization of function $\tau$ in Theorem 3

**Theorem 7.** Let there be real numbers  $\mu, \lambda$  such that (8) fulfills  $R(x) + \mu p_O(x) = \lambda p_I(x)$  for all  $x \in \mathcal{X}$ . Then, there are real numbers  $\gamma_1, \gamma_2, \chi_1, \chi_2$ , where  $\gamma_1 \leq \gamma_2$ , and  $\chi_1, \chi_2 \in [0, 1]$ , such that the selective function  $\tau$  defined as

$$\tau(x) = \begin{cases} 1 & \text{if } \gamma_1 < \frac{p_O(x)}{p_I(x)} < \gamma_2 \\ \chi_1 & \text{if } \frac{p_O(x)}{p_I(x)} = \gamma_1 \\ \chi_2 & \text{if } \frac{p_O(x)}{p_I(x)} = \gamma_2 \\ 0 & \text{otherwise} \end{cases}$$

is an optimal solution to (8).

*Proof.* Since, for all  $x \in \mathcal{X}$ ,  $R(x) = \lambda p_I(x) - \mu p_O(x)$ , we can write

$$R^S(h, c) = \frac{\int_{\mathcal{X}} R(x) c(x) dx}{\phi(c)} = \frac{\lambda \phi(c) - \mu \rho(c)}{\phi(c)} = \lambda - \mu \frac{\rho(c)}{\phi(c)}.$$

For  $a, b \in \mathbb{R}_+$ , let  $M_{a,b} = \{x \in \mathcal{X} \mid a < \frac{p_O(x)}{p_I(x)} < b\}$ , and  $M_a = \{x \in \mathcal{X} \mid \frac{p_O(x)}{p_I(x)} = a\}$ . Define continuous functions  $\Phi, P : [0, 1]^2 \times \mathbb{R}_+^2 \rightarrow [0, 1]$  as

$$\begin{aligned} \Phi(\alpha, \beta, s, t) &= \alpha \int_{M_s} p_I(x) dx + \int_{M_{s,t}} p_I(x) dx + \llbracket s < t \rrbracket \beta \int_{M_t} p_I(x) dx, \\ P(\alpha, \beta, s, t) &= \alpha \int_{M_s} p_O(x) dx + \int_{M_{s,t}} p_O(x) dx + \llbracket s < t \rrbracket \beta \int_{M_t} p_O(x) dx. \end{aligned}$$

Distinguish two cases.

549 Case  $\mu < 0$ . The problem reduces to

$$\min_{h,c} \frac{\rho(c)}{\phi(c)} \quad \text{s.t.} \quad \phi(c) \geq \phi_{\min} \quad \text{and} \quad \rho(c) \leq \rho_{\max}.$$

550 An optimal solution  $\tau$  is obtained by setting

$$\begin{aligned} \gamma_1 &= 0, \\ \gamma_2 &= \inf \{t \in \mathbb{R}_+ \mid \Phi(1, 1, 0, t) \geq \phi_{\min}\}, \\ \chi_2 &= \begin{cases} \inf\{\beta \in [0, 1] \mid \Phi(1, \beta, 0, \gamma_2) \geq \phi_{\min}\} & \text{if } \gamma_2 > 0 \\ \inf\{\beta \in [0, 1] \mid \Phi(\beta, 0, 0, 0) \geq \phi_{\min}\} & \text{otherwise} \end{cases}, \\ \chi_1 &= \begin{cases} 1 & \text{if } \gamma_2 > 0 \\ \chi_2 & \text{otherwise} \end{cases}. \end{aligned}$$

551 Note that  $P(\chi_1, \chi_2, \gamma_1, \gamma_2) > \rho_{\max}$  means that the problem is not feasible.

552 Case  $\mu > 0$ . The problem reduces to

$$\max_{h,c} \frac{\rho(c)}{\phi(c)} \quad \text{s.t.} \quad \phi(c) \geq \phi_{\min} \quad \text{and} \quad \rho(c) \leq \rho_{\max}.$$

553 Define a partial function  $F : [0, 1] \times \mathbb{R}_+ \rightarrow [0, 1] \times \mathbb{R}_+$  such that  $F(\alpha, s) = (\beta, t)$  iff

$$\begin{aligned} P(\alpha, \beta, s, t) &= \rho_{\max}, \\ t &= \sup\{a \in \mathbb{R}_+ \mid P(\alpha, 0, s, a) \leq \rho_{\max}\}, \\ \beta &= \sup\{b \in [0, 1] \mid P(\alpha, b, s, t) \leq \rho_{\max}\}. \end{aligned}$$

554 By the assumption that the problem is feasible, an optimal solution  $\tau$  is obtained by setting

$$\begin{aligned} \gamma_1 &= \sup\{s \in \mathbb{R}_+ \mid \exists \alpha \in [0, 1] : F(\alpha, s) = (\beta, t) \wedge \Phi(\alpha, \beta, s, t) \geq \phi_{\min}\}, \\ \chi_1 &= \sup\{\alpha \in [0, 1] \mid F(\alpha, \gamma_1) = (\beta, t) \wedge \Phi(\alpha, \beta, \gamma_1, t) \geq \phi_{\min}\}, \\ (\chi_2, \gamma_2) &= F(\chi_1, \gamma_1). \end{aligned}$$

555 □

## 556 A.5 Linear programming formulation of the Bounded TPR-FPR model for finite input sets

557 **Lemma 1.** For any  $(h, c)$  optimal to (8),  $\phi(c) = \phi_{\min}$  unless  $R^S(h, c) = 0$ .

558 *Proof.* By contradiction. Assume that  $R^S(h, c) > 0$  and  $\phi(c) = \alpha \cdot \phi_{\min}$  for some  $\alpha > 1$ . Let  $c'$  be  
559 the selective function defined by  $c'(x) = c(x)/\alpha$  for all  $x \in \mathcal{X}$ . Then,

$$\begin{aligned} \phi(c') &= \phi_{\min}, \\ \rho(c') &= \frac{\rho(c)}{\alpha} \leq \rho_{\max}, \\ R^S(h, c') &= \frac{R^S(h, c)}{\alpha} < R^S(h, c), \end{aligned}$$

560 and thus  $(h, c')$  contradicts the optimality of  $(h, c)$ . □

561 If  $\mathcal{X}$  is a finite set, Lemma 1 enables us to reformulate Problem 1 as the following linear program:

$$\min_{c \in [0, 1]^{\mathcal{X}}} \sum_{x \in \mathcal{X}} \frac{1}{\phi_{\min}} R(h, x) c(x) \quad \text{s.t.} \quad \sum_{x \in \mathcal{X}} p_I(x) c(x) = \phi_{\min}, \quad \sum_{x \in \mathcal{X}} p_O(x) c(x) \leq \rho_{\max}. \quad (21)$$

## 562 A.6 Proof of Theorem 5

563 Let  $(h, c^*)$  be optimal to (10). Denote  $C = \phi(c^*)$ . By rewriting (10), it turns out that  $(h, c^*)$  is  
564 optimal to

$$\min_{h,c} \int_{\mathcal{X}} \frac{1}{C} R(x) c(x) dx \quad \text{s.t.} \quad \begin{aligned} \phi(c) &= C \\ \rho(c) &\leq \frac{(1-\pi)(1-\kappa_{\min})}{\pi \kappa_{\min}} C. \end{aligned}$$

565 According to Lemma 1, this is synonymous with (8), and as a result, Theorem 3 is applicable to  $c^*$ .

## B Post-hoc tuning and evaluation metrics

### B.1 Figures

In Sec. 3, we proposed new evaluation metrics and applied them to synthetic data and exemplar single-score and double-score methods. Synthetic data and exemplar methods are described in Sec 3.1. The proposed evaluation metrics follow from the definition of an optimal OOD selective classifier. We provided two such formulations that avoid the definition of the loss function. Namely, we propose the bounded TPR-FPR rejection model and the Bounded Precision-Recall rejection model.

In case of the bounded TPR-FPR model, the objective, and also the evaluation metric, is the selective risk attained  $R_n^S$  at minimal acceptable TPR  $\rho_{\min}$  and maximal acceptable FPR  $\rho_{\max}$ . In addition to reporting a selective risk for a single operating point, it can be useful to fix the maximal acceptable FPR  $\rho_{\max}$  and show the selective risk  $R_n^S$  as the function of varying TPR/coverage  $\phi_{\max}$ , which yields the Risk-Coverage curve at FPR  $\rho_{\max}$ . The RC curve at  $\rho_{\max} = 0.2$  for our example on synthetic data is shown in Figure 1(a). The proposed double score method  $D(\mathbb{R})$  is seen to achieve the lowest selective risk in the entire range of coverages available. The selective risk of the methods  $D(\mathbb{R})$  and  $C(0)$  is the same; however, the method  $C(0)$  has much lower maximal attainable coverage, namely,  $\phi_{\max} = 0.58$  and hence the method is marked as unable to achieve the target coverage; see Table 1.

The problem of defining the TPR-FPR model (13) can be infeasible. To choose a feasible target value of  $\phi_{\min}$  and  $\rho_{\max}$ , it is advantageous to plot the ROC curve, that is, the TPR and FPR values attainable by the classifiers in  $\mathcal{Q}$ . ROC curve for the methods in our example is shown in Figure 1(b). The operation point  $(\phi_{\min}, \rho_{\max})$  is attainable if the ROC curve of the given method is entirely above the point.

In case of the bounded Precision-Recall model, the objective, and also the evaluation metric, is the selective risk attained  $R_n^S$  at minimal acceptable Precision  $\kappa_{\min}$  and minimal acceptable Recall/TPR  $\phi_{\min}$ . In our example, the single-score method achieves the same selective risk under both models as we use the same target TPR/recall and the selective risk is a monotonic function of the score, see discussion in sec 3.3, hence we do not show the risk-coverage curve at fixed precision. However, we show the Precision-Recall curve, Figure 1(c), which is useful for determining the feasible target value for precision and recall. Again, the operation point  $(\kappa_{\min}, \phi_{\min})$  is achievable if the PR curve of the given method is entirely above the point.

### B.2 Algorithms

The single-score OOD methods output a set of selective OOD classifiers  $\mathcal{Q} = \{(h, c) \mid c(x) = \mathbb{I}[s(x) \leq \lambda], \lambda \in \mathbb{R}\}$  parameterized by the decision threshold  $\lambda$ . Double-score OOD methods output a set  $\mathcal{Q} = \{(h, c) \mid c(x) = \mathbb{I}[s_r(x) + \mu s_g(x) \leq \lambda], \mu \in \mathbb{R}, \lambda \in \mathbb{R}\}$  parameterized by  $\lambda \in \mathbb{R}$  and  $\mu \in \mathbb{R}$ .

The post hoc tuning aims to find the best OOD selective classifier out of  $\mathcal{Q}$  based on the appropriate metric. To this end, the existing methods used the AUROC, AUPR or OSCR score as the metric to find the best classifier. Instead, we formulate the bounded TPR-FPR and the bound Precision-Recall model, where we find the best selective amounts to solving the constrained optimization problem (13) and (14), respectively.

In case of single-score methods, the problem (13) and (14) 1-D optimization, namely, one needs to find the decision threshold  $\lambda \in \mathbb{R}$  which leads to the minimal selective risk and simultaneously satisfies both constraints on the validation set  $\mathcal{T} = ((x_i, \bar{y}_i) \in \mathcal{X} \times \bar{\mathcal{Y}} \mid i = 1, \dots, n)$ . The threshold  $\lambda$  influences the involved metrics, that is,  $(R_n^S(h, c), \phi_n(c), \rho_n(c), \kappa_n(c))$ , only via the value of the selective function  $c(x) = \mathbb{I}[s(x) \leq \lambda]$  which is a step function of the optimized threshold  $\lambda$ . Hence, we can see  $(R_n^S(\lambda), \phi_n(\lambda), \rho_n(\lambda), \kappa_n(\lambda))$ , as a function of  $\lambda$  and we can find all  $n + 1$  achievable values of  $(R_n^S(\lambda), \phi_n(\lambda), \rho_n(\lambda), \kappa_n(\lambda))$  in a single sweep over the validation examples  $\mathcal{T}$  sorted according to the value of  $s(x_i)$ . This procedure has complexity  $\mathcal{O}(n \log n)$  attributed to the sorting of  $n$  examples.

In case of the double-score methods, we need to optimize w.r.t.  $\lambda$  and  $\mu$  which are the free parameters of the selective function  $c(x) = \mathbb{I}[s_r(x) + \mu s_g(x) \leq \lambda]$ . The selective classifier can be seen as a binary in 2-D space. Hence, we equivalently parameterize the selective function as  $c(x) =$



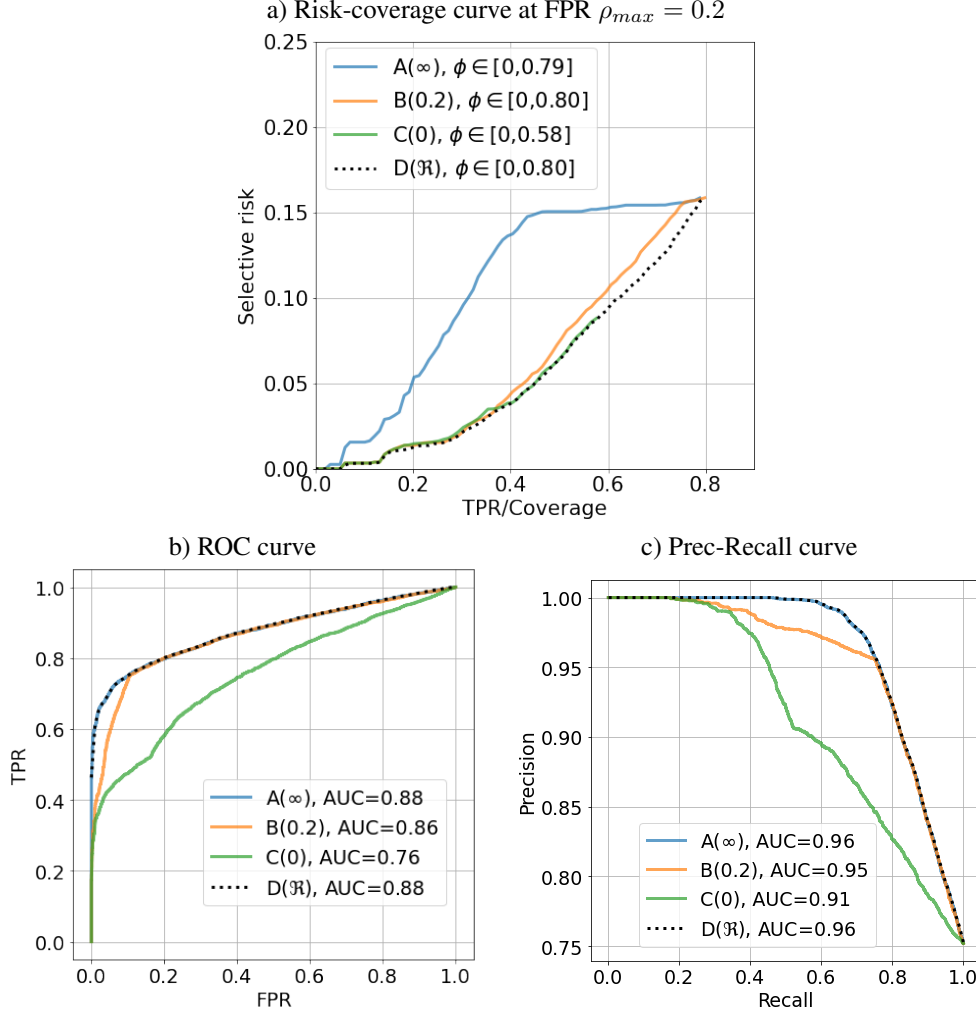

Figure 1: Evaluation curves for the exemplar methods on the synthetic data. The risk-coverage/TPR curve at the maximal acceptable FPR is shown in Fig. a). For each method we also show attainable coverage  $\phi$ . The ROC curve and the Precision-Recall curve are shown in Fig. b) and c), respectively.

618  $\llbracket s_r(x), \cos(\alpha) + s_g(x) \sin(\alpha) \leq \lambda' \rrbracket$  where  $\alpha \in \mathcal{A} = [0, \pi]$  and  $\lambda' \in \mathbb{R}$ . We approximate  $\mathcal{A}$  by a  
619 finite set  $\bar{\mathcal{A}} \subset \mathcal{A}$ , where  $\bar{\mathcal{A}}$  contains  $d$  equidistantly placed values over the interval  $[0, \pi]$ . For each  
620  $\alpha \in \bar{\mathcal{A}}$ , we compute all values  $n + 1$  of  $(R_n^S(\lambda), \phi_n(\lambda), \rho_n(\lambda), \kappa_n(\lambda))$ , using the algorithm described  
621 above. We found that setting  $d = 360$  is enough, as higher values  $d$  do not change the results.
